# Supplementary material for: Potential of digital applications for self-management and other outcomes in inflammatory rheumatic diseases: a systematic literature review
Source: Frontiers journal article supplement (doi:10.3389/fmed.2025.1617151), 2025-07-09
Supplement: Table_2.pdf [file Table_2.pdf]

## *Supplementary Material*

### **Supplementary File S2** Critical Appraisal Skills Program (CASP) assessment of included studies

*CASP checklist for RCTs (see below for details of assessments)*

| Study                           | 1 | 2 | 3 | 4a | 4b | 4c | 5 | 6 | 7 | 8 | 9 | 10 | 11 |
|---------------------------------|---|---|---|----|----|----|---|---|---|---|---|----|----|
| Allam (2015)                    | Y | Y | Y | Y  | N  | C  | Y | Y | Y | N | Y | Y  | Y  |
| Allen (2021)                    | Y | Y | Y | N  | Y  | C  | Y | Y | Y | N | Y | Y  | Y  |
| Ferwerda (2017)                 | Y | Y | Y | N  | N  | C  | N | Y | Y | N | Y | Y  | Y  |
| Khan (2020)                     | Y | Y | Y | N  | N  | C  | Y | Y | Y | N | N | Y  | Y  |
| Knudsen (2024)                  | Y | Y | Y | N  | N  | C  | Y | Y | Y | Y | N | Y  | Y  |
| Kurt (2024)                     | Y | Y | C | N  | Y  | C  | Y | Y | Y | Y | Y | Y  | Y  |
| Li (2025)                       | Y | Y | Y | N  | Y  | Y  | Y | Y | Y | Y | Y | Y  | Y  |
| Li (2020)                       | Y | Y | Y | N  | N  | Y  | Y | Y | Y | Y | Y | Y  | Y  |
| Lorig (2008)                    | Y | C | Y | N  | N  | C  | Y | Y | Y | N | Y | Y  | Y  |
| Pouls (2022)                    | Y | Y | Y | N  | N  | Y  | Y | Y | Y | Y | N | Y  | Y  |
| Rodríguez Sánchez-Laulhé (2022) | Y | Y | Y | N  | Y  | C  | N | Y | Y | Y | Y | Y  | Y  |
| Shigaki (2013)                  | Y | C | Y | N  | C  | C  | Y | Y | Y | N | Y | Y  | Y  |
| Song (2022)                     | Y | Y | Y | N  | Y  | C  | Y | Y | Y | Y | Y | Y  | Y  |
| van den Berg (2006)             | Y | Y | Y | N  | Y  | C  | Y | Y | Y | Y | Y | Y  | Y  |
| Zuidema (2019)                  | Y | Y | Y | N  | N  | C  | Y | Y | Y | Y | Y | Y  | Y  |

CASP questions: Did the study address a clearly formulated research question? 2: Was the assignment of participants to interventions randomised? 3: Were all participants who entered the study accounted for at its conclusion? 4: (a) Were the participants ‘blind’ to intervention they were given? (b) Were the investigators ‘blind’ to the intervention they were giving to participants? (c) Were the people assessing/analysing outcome/s ‘blinded’? 5: Were the study groups similar at the start of the randomised controlled trial? 6: Apart from the experimental intervention, did each study group receive the same level of care (that is, were they treated equally)? 7: Were the effects of intervention reported comprehensively? 8: Was the precision of the estimate of the intervention or treatment effect reported? 9: Do the benefits of the experimental intervention outweigh the harms and costs? 10: Can the results be applied to your local population/in your context? 11: Would the experimental intervention provide greater value to the people in your care than any of the existing interventions?

Y, Yes; N, No; C; Can’t tell

*Appraisal summary of CASP checklist for RCTs*

| <b>Study</b>       | <b>Positive/<br/>Methodologically<br/>sound</b> | <b>Negative/Relatively poor<br/>methodology</b>                                                                                                                                                                                                                                                                                                                                                                               | <b>Unknowns</b>                                                                       |
|--------------------|-------------------------------------------------|-------------------------------------------------------------------------------------------------------------------------------------------------------------------------------------------------------------------------------------------------------------------------------------------------------------------------------------------------------------------------------------------------------------------------------|---------------------------------------------------------------------------------------|
| Allam<br>(2015)    | 1, 2, 3, 4a, 5, 6, 7,<br>9, 10, 11              | 4b – the investigators were not<br>blinded to allocation into<br>intervention and control group<br><br>8 – no confidence intervals<br>were reported                                                                                                                                                                                                                                                                           | 4c – it is not mentioned<br>whether the people analysing<br>the outcomes were blinded |
| Allen<br>(2021)    | 1, 2, 3, 4b, 5, 6, 7,<br>9, 10, 11              | 4a – participants were not<br>blinded to the timing of when to<br>receive the intervention<br><br>8 – no confidence intervals<br>were reported                                                                                                                                                                                                                                                                                | 4c – it is not mentioned<br>whether the people analysing<br>the outcomes were blinded |
| Ferwerda<br>(2017) | 1, 2, 3, 6, 7, 9, 10,<br>11                     | 4a – participants were not<br>blinded because they either<br>received standard care or<br>additional treatment<br><br>4b – investigators were not<br>blinded because they had<br>contact to participants<br><br>5 – intervention group showed<br>significantly less<br><br>negative mood, lower levels of<br>self-care, mobility, and lower<br>impact of RA on daily life<br><br>8 – no confidence intervals<br>were reported | 4c – it is not mentioned<br>whether the people analysing<br>the outcomes were blinded |
| Khan<br>(2020)     | 1, 2, 3, 5, 6, 7, 10,<br>11                     | 4a - randomisation groups were<br>made known to participants<br><br>4b – investigators were not<br>blinded because they had<br>contact to participants<br><br>8 – no confidence intervals<br>were reported<br><br>9 – no effect size was<br>calculated                                                                                                                                                                        | 4c – it is not mentioned<br>whether the people analysing<br>the outcomes were blinded |

| <b>Study</b>   | <b>Positive/<br/>Methodologically<br/>sound</b> | <b>Negative/Relatively poor<br/>methodology</b>                                                                                                                                                                                                                         | <b>Unknowns</b>                                                                                                                                                                                      |
|----------------|-------------------------------------------------|-------------------------------------------------------------------------------------------------------------------------------------------------------------------------------------------------------------------------------------------------------------------------|------------------------------------------------------------------------------------------------------------------------------------------------------------------------------------------------------|
| Knudsen (2024) | 1, 2, 3, 5, 6, 7, 8, 10, 11                     | 4a – participants were not blinded, intervention group received digital-, and control group face-to-face patient education<br><br>4b – investigators were not blinded, intervention and control group were treated differently<br><br>9 – no effect size was calculated | 4c – it is not mentioned whether the people analysing the outcomes were blinded                                                                                                                      |
| Kurt (2024)    | 1, 2, 4b, 5, 6, 7, 8, 9, 10, 11                 | 4a – participants were not blinded, intervention group received additional counselling                                                                                                                                                                                  | 3 – sample size calculations are not mentioned<br><br>4c – it is not mentioned whether the people analysing the outcomes were blinded                                                                |
| Li (2025)      | 1, 2, 3, 4b, 4c, 5, 6, 7, 8, 9, 10, 11          | 4a – participants were not blinded to the timing of when to receive the intervention                                                                                                                                                                                    |                                                                                                                                                                                                      |
| Li (2020)      | 1, 2, 3, 4c, 5, 6, 7, 8, 9, 10, 11              | 4a – participants were not blinded to the timing of when to receive the intervention<br><br>4b – investigators were not blinded                                                                                                                                         |                                                                                                                                                                                                      |
| Lorig (2008)   | 1, 3, 5, 6, 7, 9, 10, 11                        | 4a – participants were not blinded, intervention group received additional treatment<br><br>4b – investigators were not blinded<br><br>8 – no confidence intervals were reported                                                                                        | 2 – it is mentioned that participants were randomised but not mentioned how the randomisation was carried out<br><br>4c – it is not mentioned whether the people analysing the outcomes were blinded |
| Pouls (2022)   | 1, 2, 3, 4c, 5, 6, 7, 8, 10, 11                 | 4a – participants were not blinded to the timing of when to receive the intervention<br><br>4b – investigators were not blinded<br><br>9 – no effect size was calculated                                                                                                |                                                                                                                                                                                                      |

| <b>Study</b>                              | <b>Positive/<br/>Methodologically<br/>sound</b> | <b>Negative/Relatively poor<br/>methodology</b>                                                                                                                                                                                     | <b>Unknowns</b>                                                                                                                                                                                                                                                                                  |
|-------------------------------------------|-------------------------------------------------|-------------------------------------------------------------------------------------------------------------------------------------------------------------------------------------------------------------------------------------|--------------------------------------------------------------------------------------------------------------------------------------------------------------------------------------------------------------------------------------------------------------------------------------------------|
| Rodríguez<br>Sánchez-<br>Laulhé<br>(2022) | 1, 2, 3, 4b, 6, 7, 8,<br>9, 10, 11              | 4a – participants were not<br>blinded, intervention group<br>received additional treatment<br><br>5 – differences between groups<br>in the pain and satisfaction<br>domains of a questionnaire                                      | 4c – it is not mentioned<br>whether the people analysing<br>the outcomes were blinded                                                                                                                                                                                                            |
| Shigaki<br>(2013)                         | 1, 3, 5, 6, 7, 9, 10,<br>11                     | 4a – participants were not<br>blinded to the timing of when to<br>receive the intervention<br><br>8 – no confidence intervals<br>were reported                                                                                      | 2 – it is mentioned that<br>participants were randomised<br>but not mentioned how the<br>randomisation was carried out<br><br>4b – it is not mentioned<br>whether the investigators<br>were blinded<br><br>4c – it is not mentioned<br>whether the people analysing<br>the outcomes were blinded |
| Song (2022)                               | 1, 2, 3, 4b, 5, 6, 7,<br>8, 9, 10, 11           | 4a – participants were not<br>blinded, intervention group<br>received additional treatment                                                                                                                                          | 4c – it is not mentioned<br>whether the people analysing<br>the outcomes were blinded                                                                                                                                                                                                            |
| van den<br>Berg (2006)                    | 1, 2, 3, 4b, 5, 6, 7,<br>8, 9, 10, 11           | 4a – participants were not<br>blinded, intervention group<br>received additional treatment                                                                                                                                          | 4c – it is not mentioned<br>whether the people analysing<br>the outcomes were blinded                                                                                                                                                                                                            |
| Zuidema<br>(2019)                         | 1, 2, 3, 5, 6, 7, 8,<br>9, 10, 11               | 4a – participants were not<br>blinded, intervention group<br>received additional treatment<br><br>4b – investigators were not<br>blinded, they informed<br>participants of allocation to<br>either control or intervention<br>group | 4c – it is not mentioned<br>whether the people analysing<br>the outcomes were blinded                                                                                                                                                                                                            |
